# Supplementary material for: Thermal stability of alkali and alkaline-earth substituted LAMOX oxide-ion conductors
Source: Royal Society of Chemistry journal article supplement (doi:10.1039/b915080c), 2009-11-10
Supplement: b915080c.pdf [file b915080c.pdf]

### **Electronic supplementary information :**

Room temperature X-ray diffraction patterns of 19 as-prepared pure samples, after final firing at temperatures reported in table 1, and cooling down to room temperature at 5°C/min.

\* : main superstructure peaks

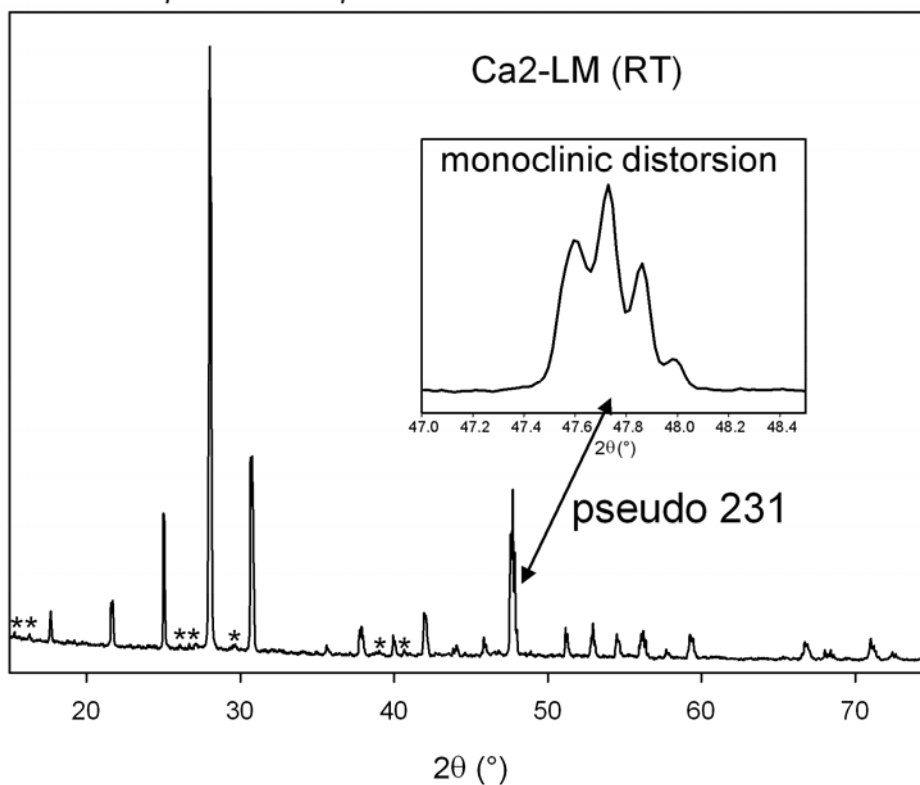

Figure S1: Room temperature XRD pattern of  $\text{La}_{1.96}\text{Ca}_{0.04}\text{Mo}_2\text{O}_{8.98}$  (Ca2-LM), showing the monoclinic distortion and main superstructure peaks of the  $\alpha$  LAMOX form.

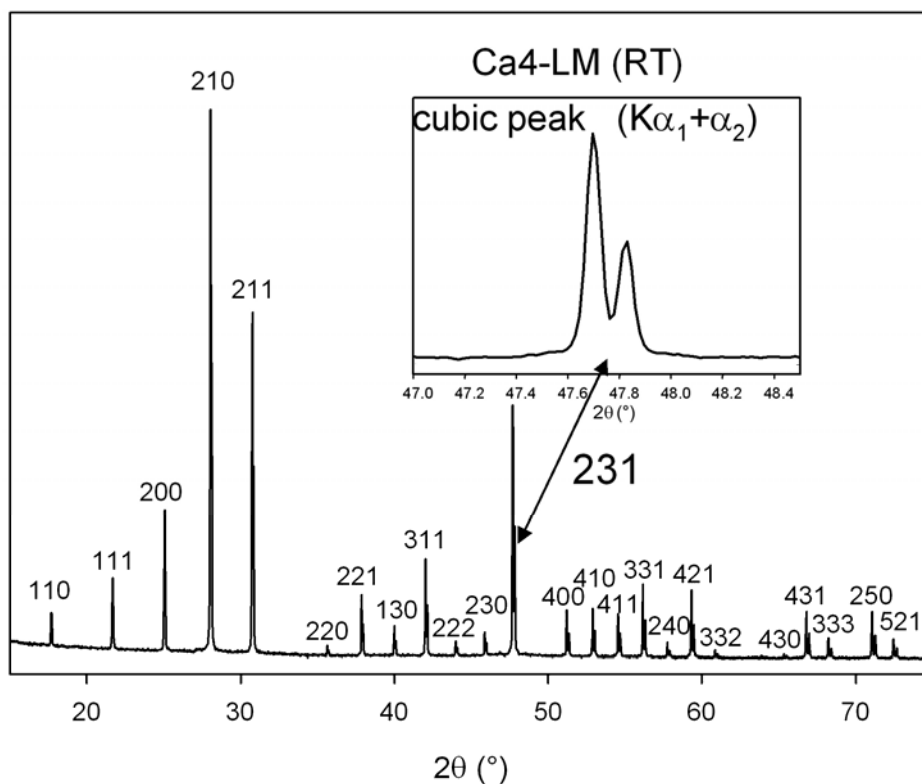

Figure S2 : Room temperature XRD pattern of  $\text{La}_{1.92}\text{Ca}_{0.08}\text{Mo}_2\text{O}_{8.96}$  (Ca4-LM), showing the absence of monoclinic distortion and the peak indexation of the cubic  $\beta$  LAMOX form.

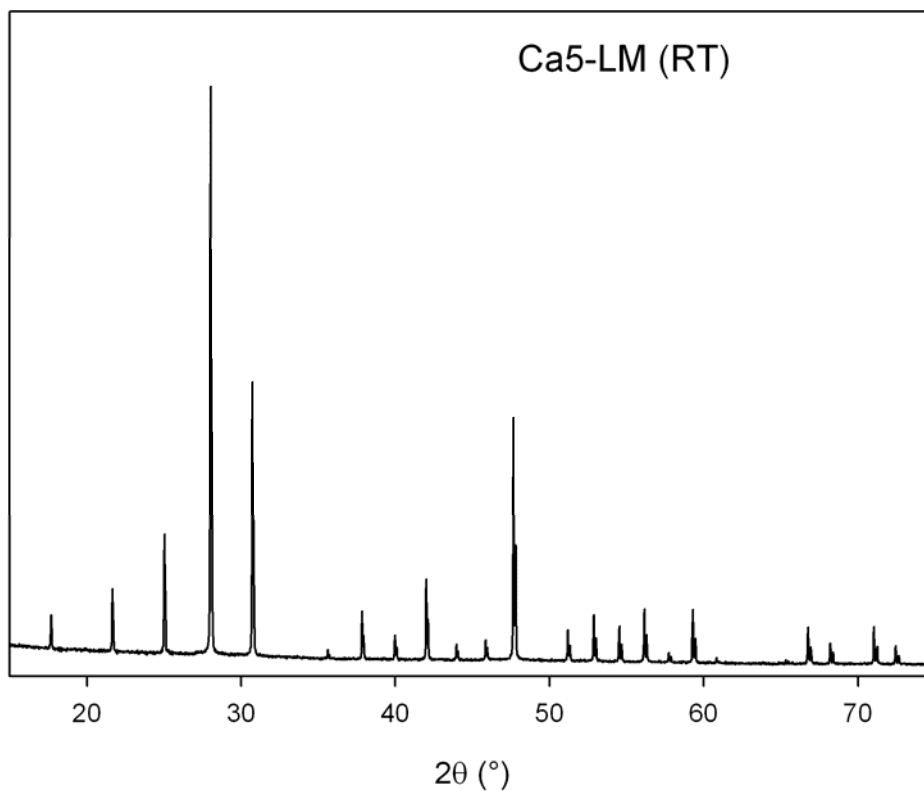

Figure S3 : Room temperature XRD pattern of La<sub>1.9</sub>Ca<sub>0.1</sub>Mo<sub>2</sub>O<sub>8.95</sub> (Ca5-LM).

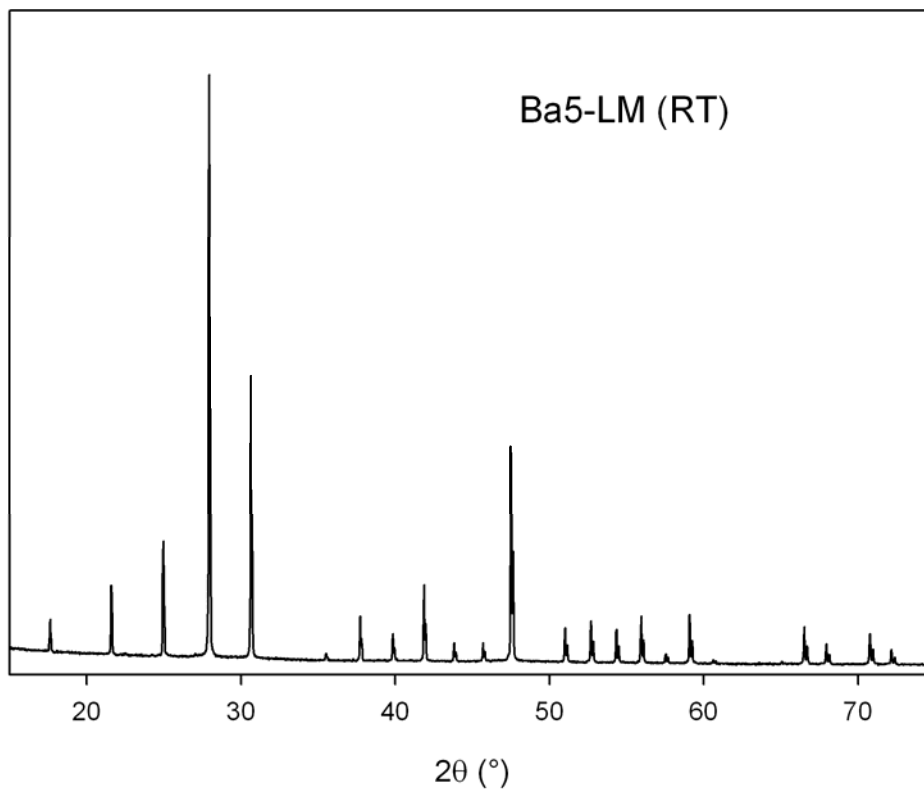

Figure S4 : Room temperature XRD pattern of La<sub>1.9</sub>Ba<sub>0.1</sub>Mo<sub>2</sub>O<sub>8.95</sub> (Ba5-LM).

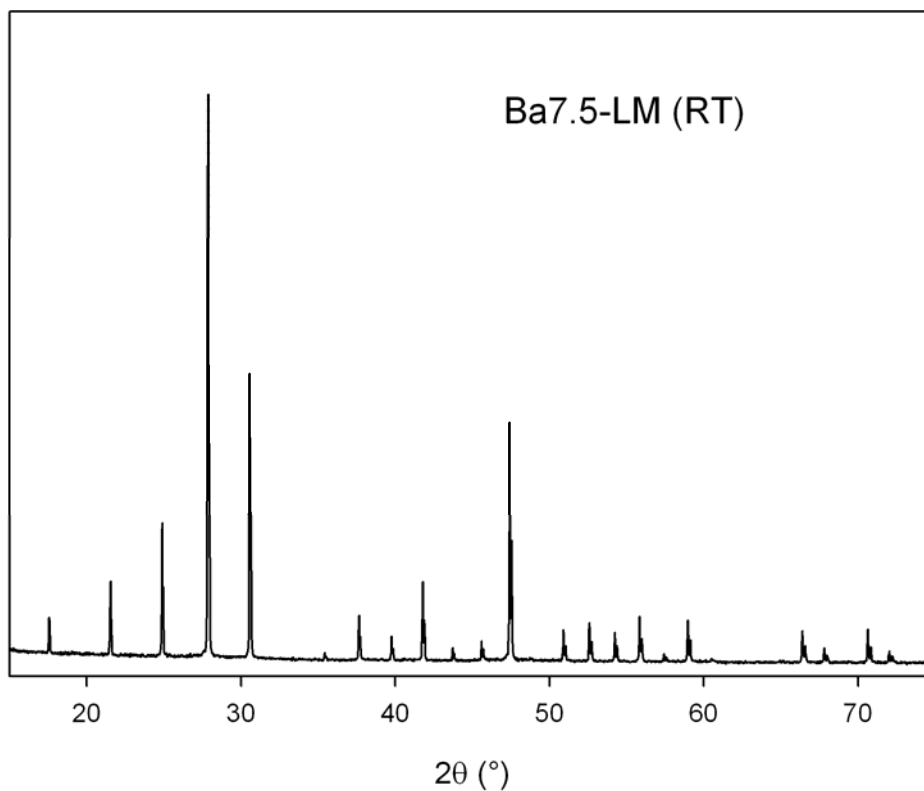

Figure S5 : Room temperature XRD pattern of  $\text{La}_{1.85}\text{Ba}_{0.15}\text{Mo}_2\text{O}_{8.925}$  (Ba7.5-LM).

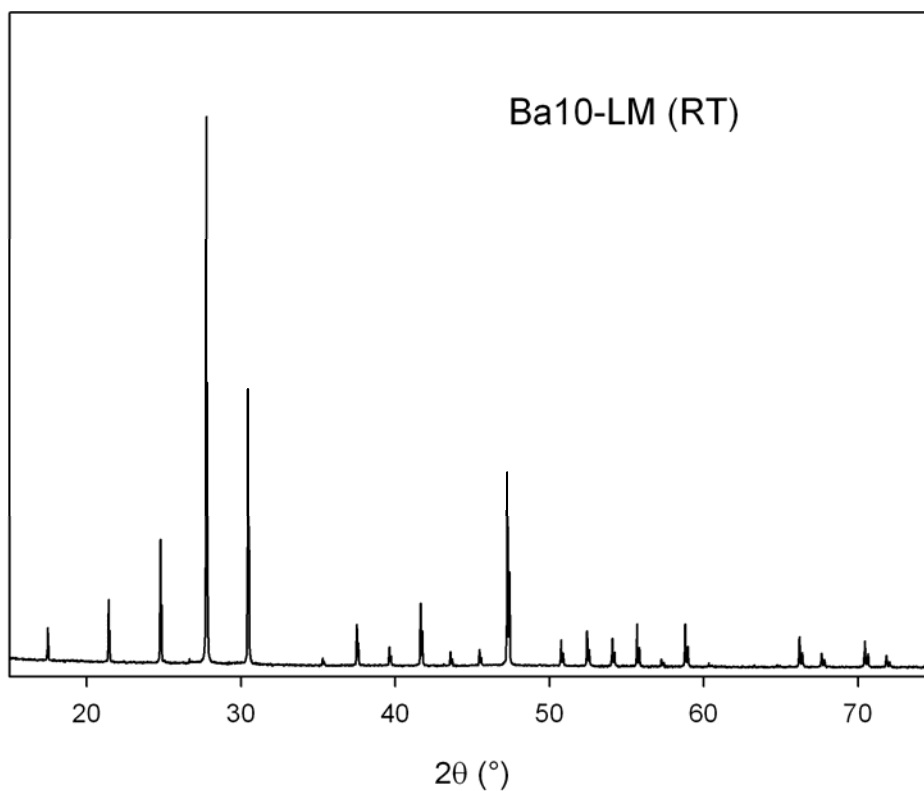

Figure S6 : Room temperature XRD pattern of  $\text{La}_{1.8}\text{Ba}_{0.2}\text{Mo}_2\text{O}_{8.9}$  (Ba10-LM).

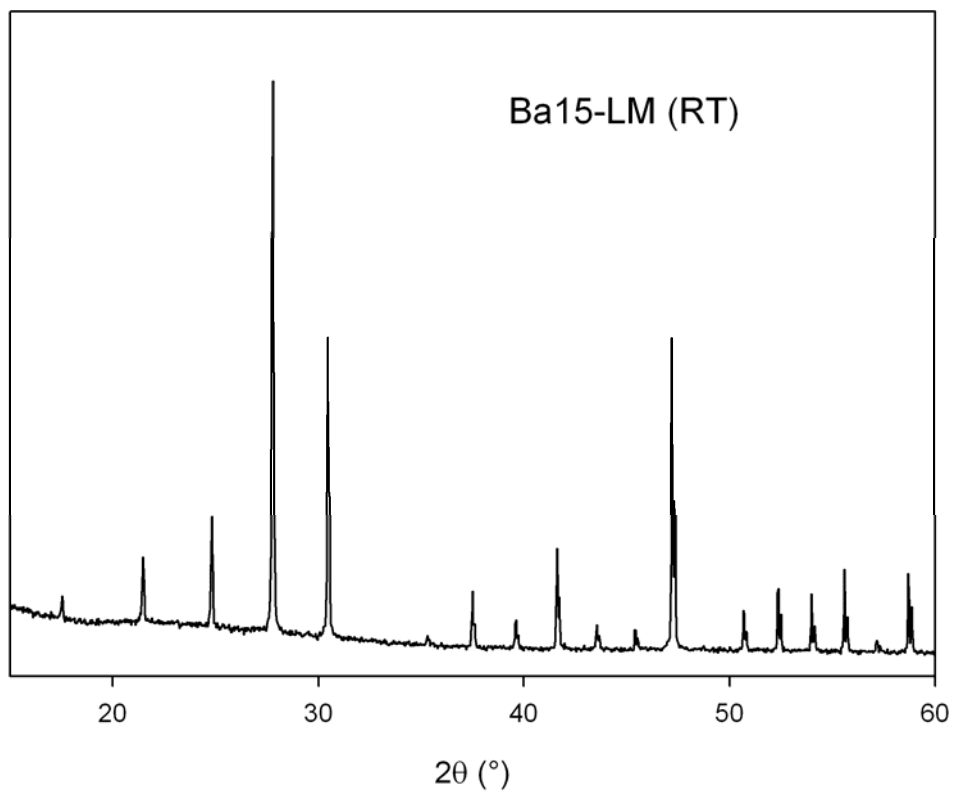

Figure S7 : Room temperature XRD pattern of  $\text{La}_{1.7}\text{Ba}_{0.3}\text{Mo}_2\text{O}_{8.85}$  (Ba15-LM).

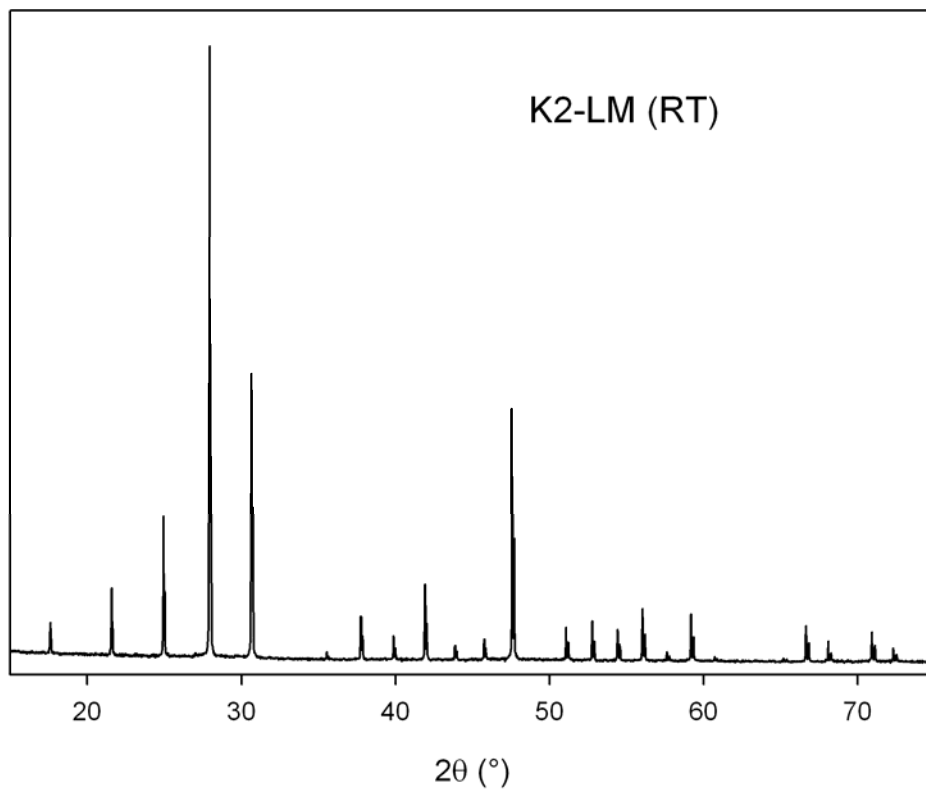

Figure S8 : Room temperature XRD pattern of  $\text{La}_{1.96}\text{K}_{0.04}\text{Mo}_2\text{O}_{8.96}$  (K2-LM).

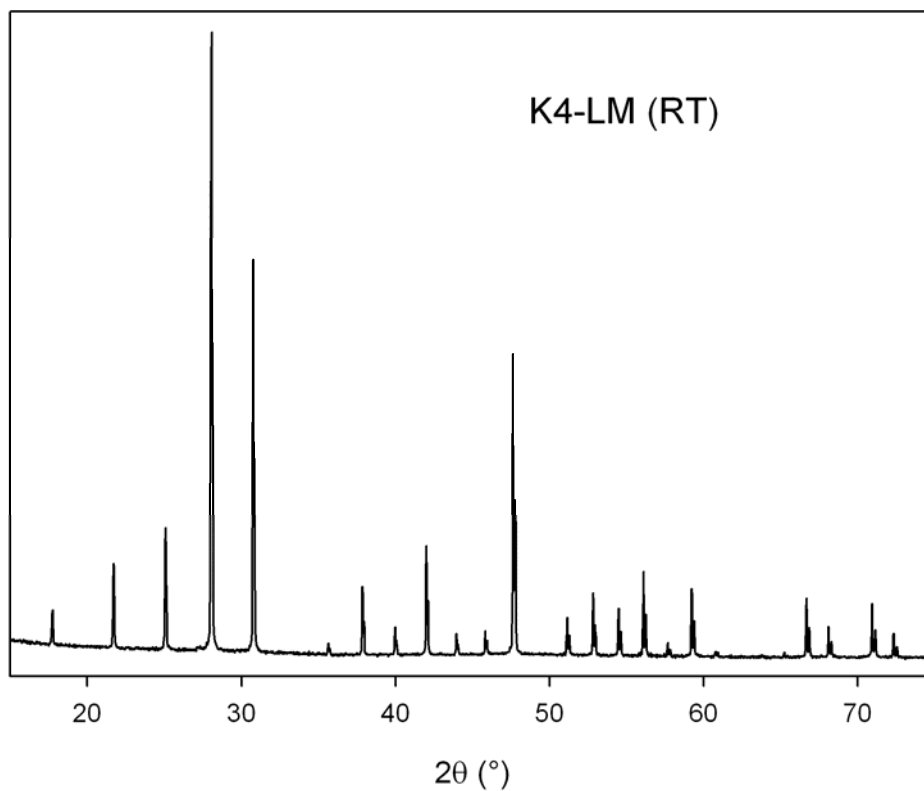

Figure S9 : Room temperature XRD pattern of  $\text{La}_{1.92}\text{K}_{0.08}\text{Mo}_2\text{O}_{8.92}$  (K4-LM).

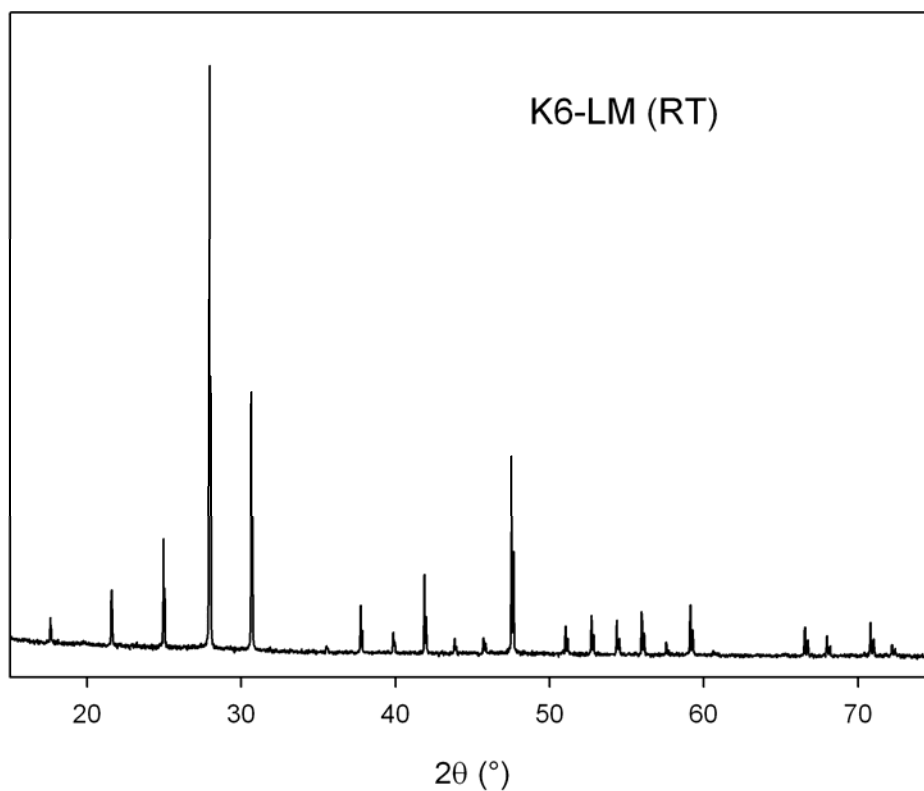

Figure S10 : Room temperature XRD pattern of  $\text{La}_{1.88}\text{K}_{0.12}\text{Mo}_2\text{O}_{8.88}$  (K6-LM).

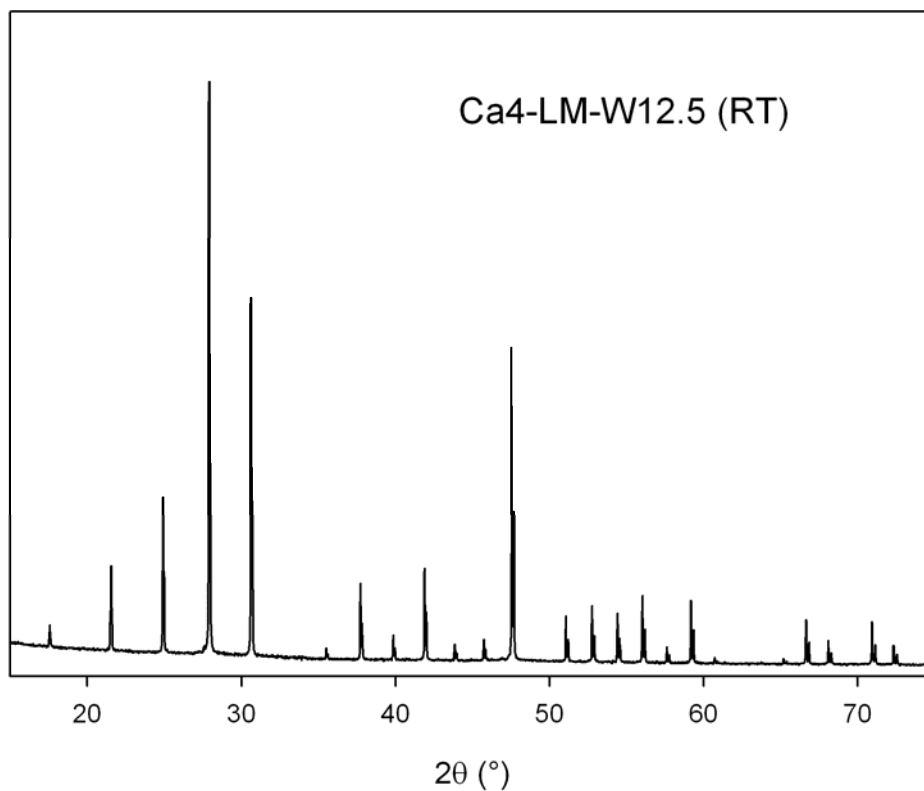

Figure S11 : Room temperature XRD pattern of  $\text{La}_{1.92}\text{Ca}_{0.08}\text{Mo}_{1.75}\text{W}_{0.25}\text{O}_{8.96}$  (Ca4-LM-W12.5).

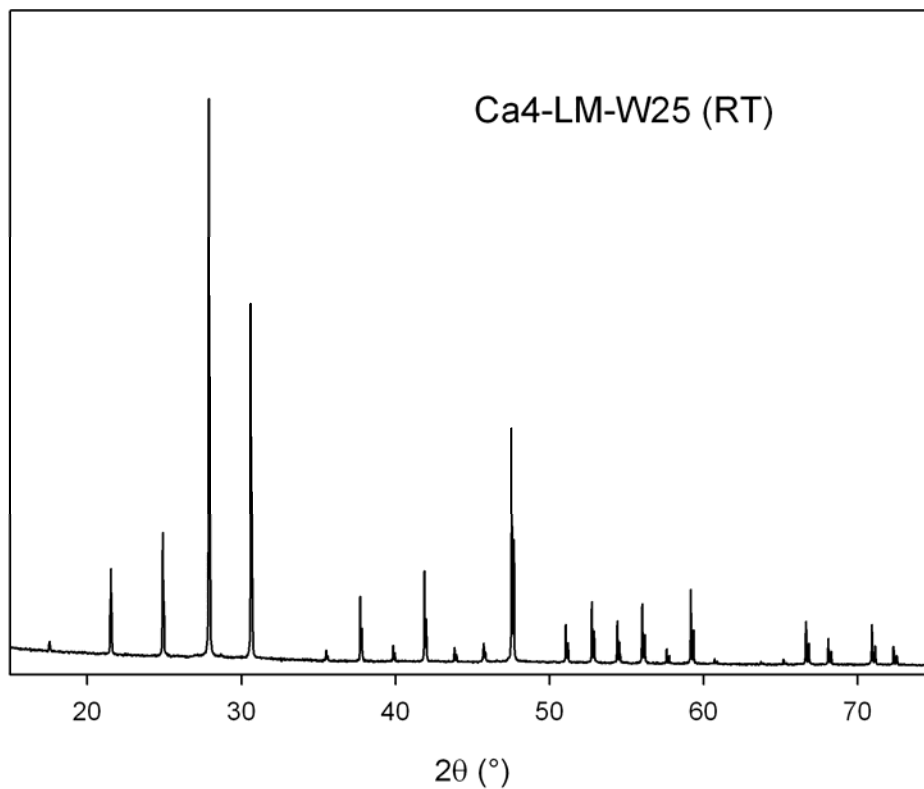

Figure S12 : Room temperature XRD pattern of  $\text{La}_{1.92}\text{Ca}_{0.08}\text{Mo}_{1.5}\text{W}_{0.5}\text{O}_{8.96}$  (Ca4-LM-W25).

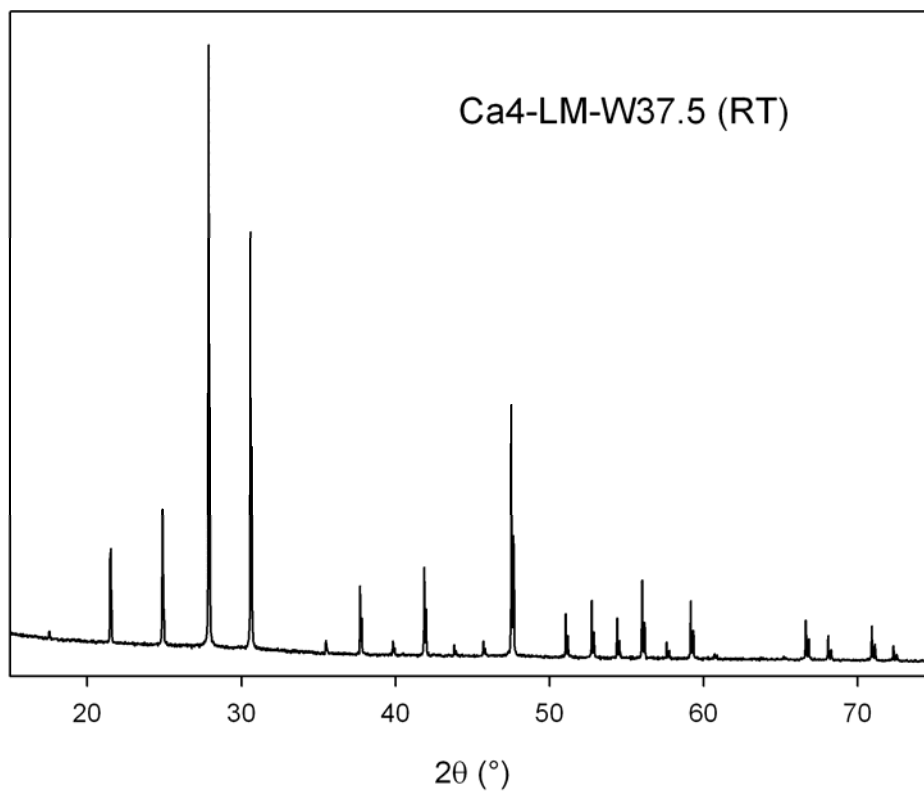

Figure S13 : Room temperature XRD pattern of  $\text{La}_{1.92}\text{Ca}_{0.08}\text{Mo}_{1.25}\text{W}_{0.75}\text{O}_{8.96}$  (Ca4-LM-W37.5).

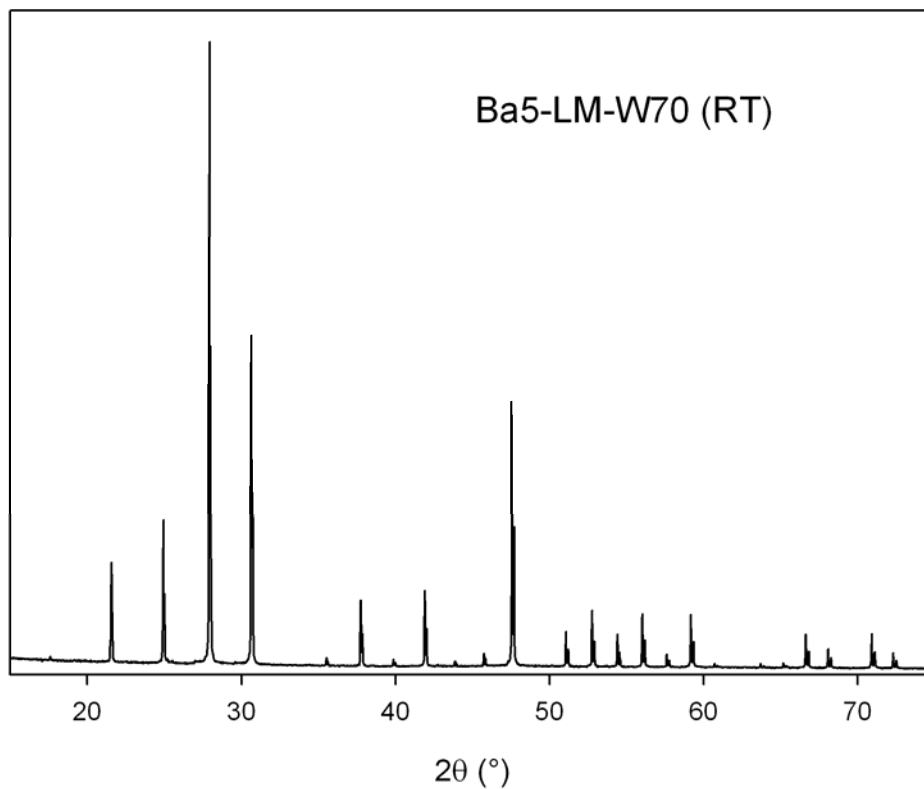

Figure S14 : Room temperature XRD pattern of  $\text{La}_{1.9}\text{Ba}_{0.1}\text{Mo}_{0.6}\text{W}_{1.4}\text{O}_{8.95}$  (Ba5-LM-W70).

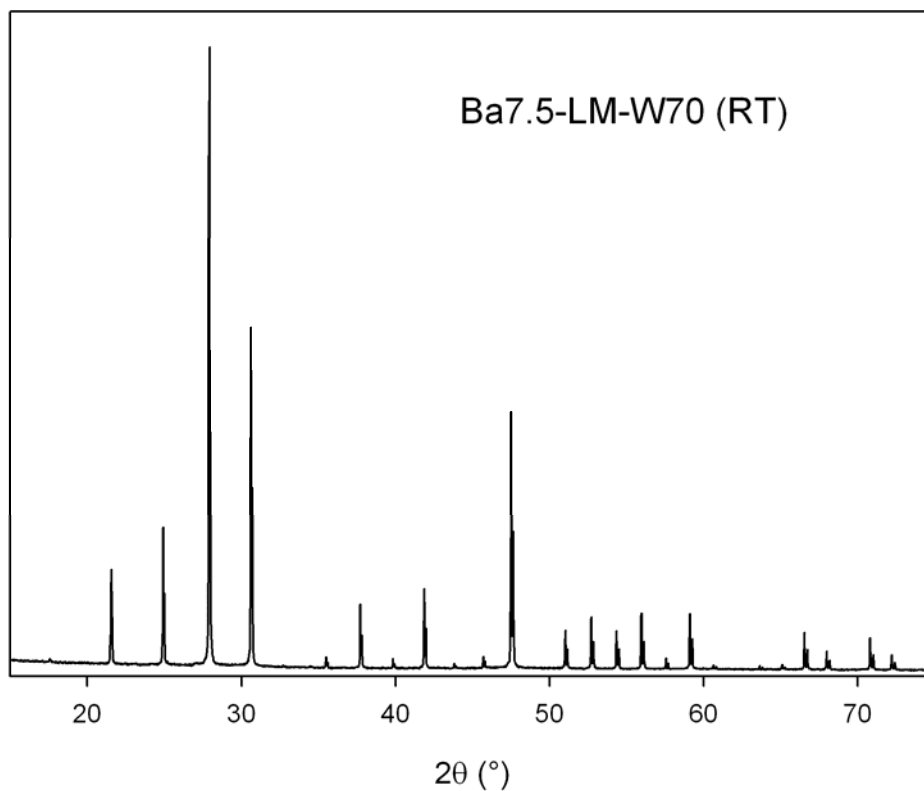

Figure S15 : Room temperature XRD pattern of  $\text{La}_{1.85}\text{Ba}_{0.15}\text{Mo}_{0.6}\text{W}_{1.4}\text{O}_{8.925}$  (Ba7.5-LM-W70).

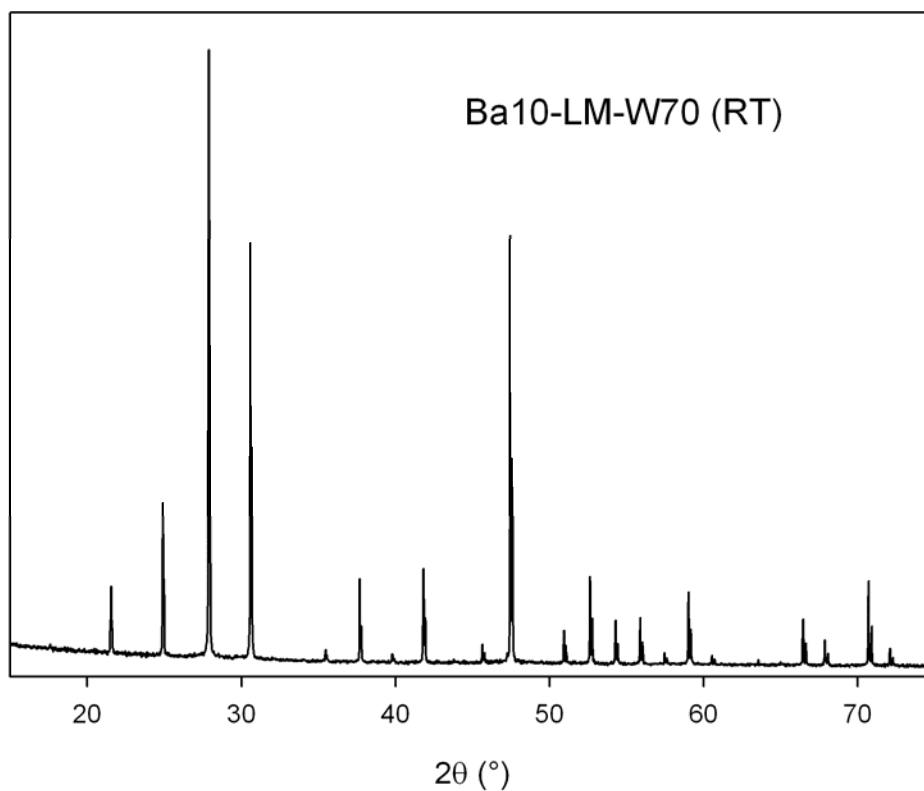

Figure S16 : Room temperature XRD pattern of  $\text{La}_{1.8}\text{Ba}_{0.2}\text{Mo}_{0.6}\text{W}_{1.4}\text{O}_{8.9}$  (Ba10-LM-W70).

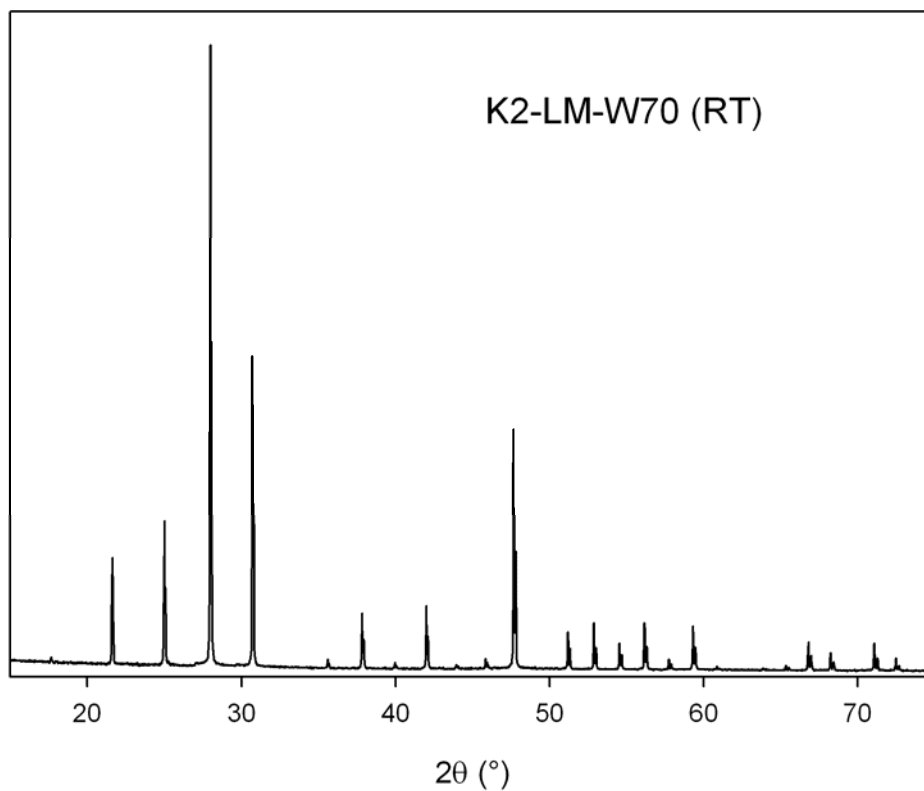

Figure S17 : Room temperature XRD pattern of  $\text{La}_{1.96}\text{K}_{0.04}\text{Mo}_{0.6}\text{W}_{1.4}\text{O}_{8.96}$  (K2-LM-W70).

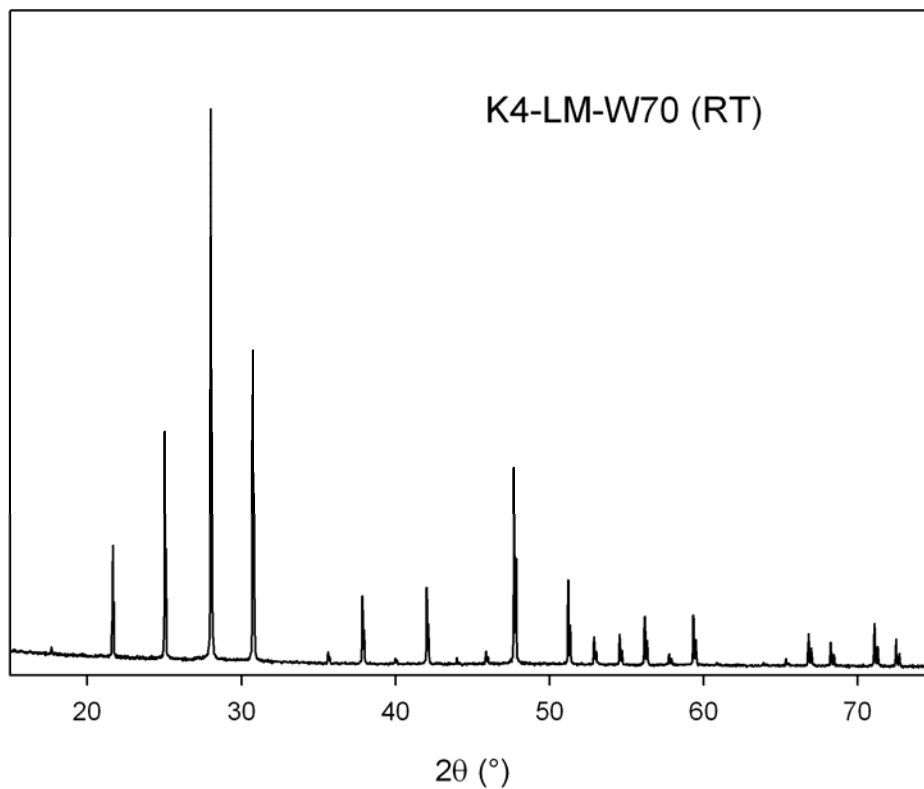

Figure S18 : Room temperature XRD pattern of  $\text{La}_{1.92}\text{K}_{0.08}\text{Mo}_{0.6}\text{W}_{1.4}\text{O}_{8.92}$  (K4-LM-W70).

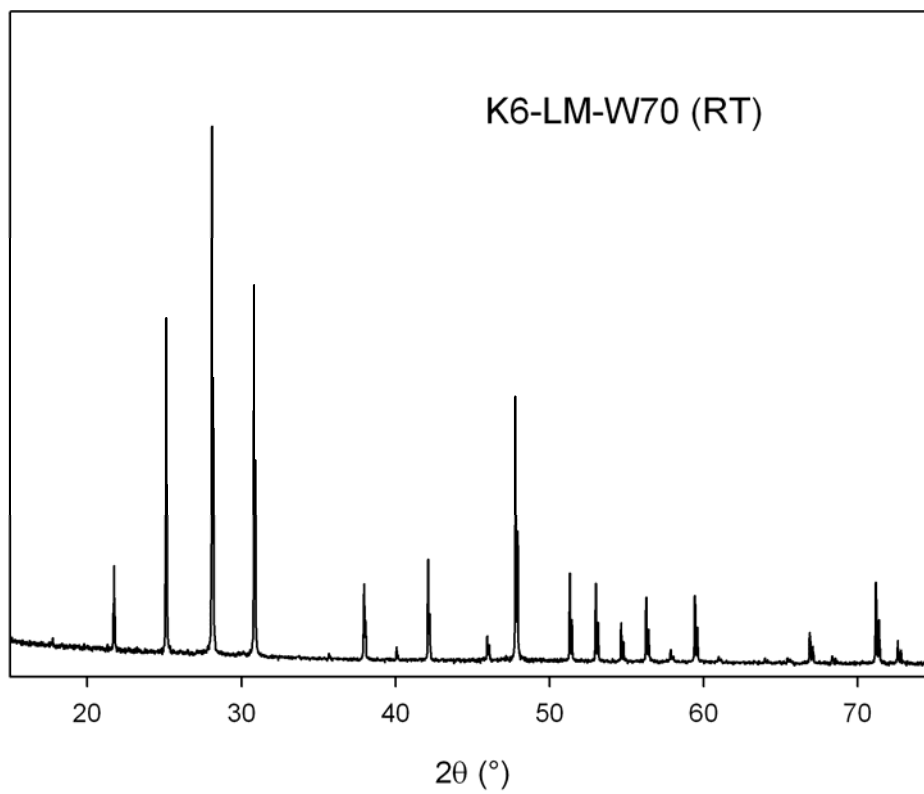

Figure S19 : Room temperature XRD pattern of  $\text{La}_{1.88}\text{K}_{0.12}\text{Mo}_{0.6}\text{W}_{1.4}\text{O}_{8.88}$  (K6-LM-W70).
